# Supplementary material
Source: MDPI journal article supplement (https://www.mdpi.com/2571-6255/5/5/130)
Supplement: s1 [file s1 › fire-1852986-supplementary.pdf]

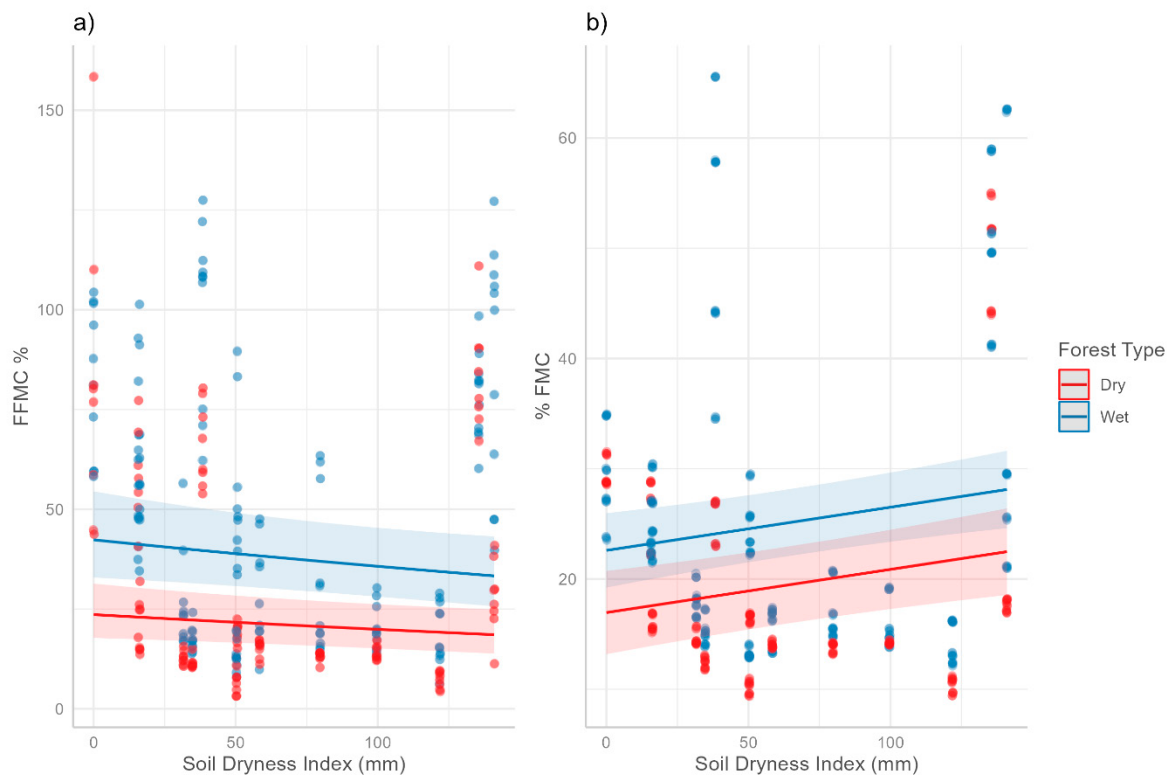

**Figure S1.** Linear mixed effect model effect plots of the two measures of fuel moisture content used in this study plotted against soil dryness index (SDI) broken down by wet and dry *Eucalyptus* forest types. **a).** Log gravimetric litter (c. 1-hour fuels) FFMC % versus SDI by forest type; and **b)** percentage gravimetric fuel moisture stick (c. 10-hour fuels) moisture content (% FMC) versus SDI by forest type.
